# Supplementary material for: Elimination of p19ARF‐expressing cells protects against pulmonary emphysema in mice
Source: PubMed Central journal article supplement (PMC6156494; doi:10.1111/acel.12827), 2018-07-30

Mikawa et al. Figure S3

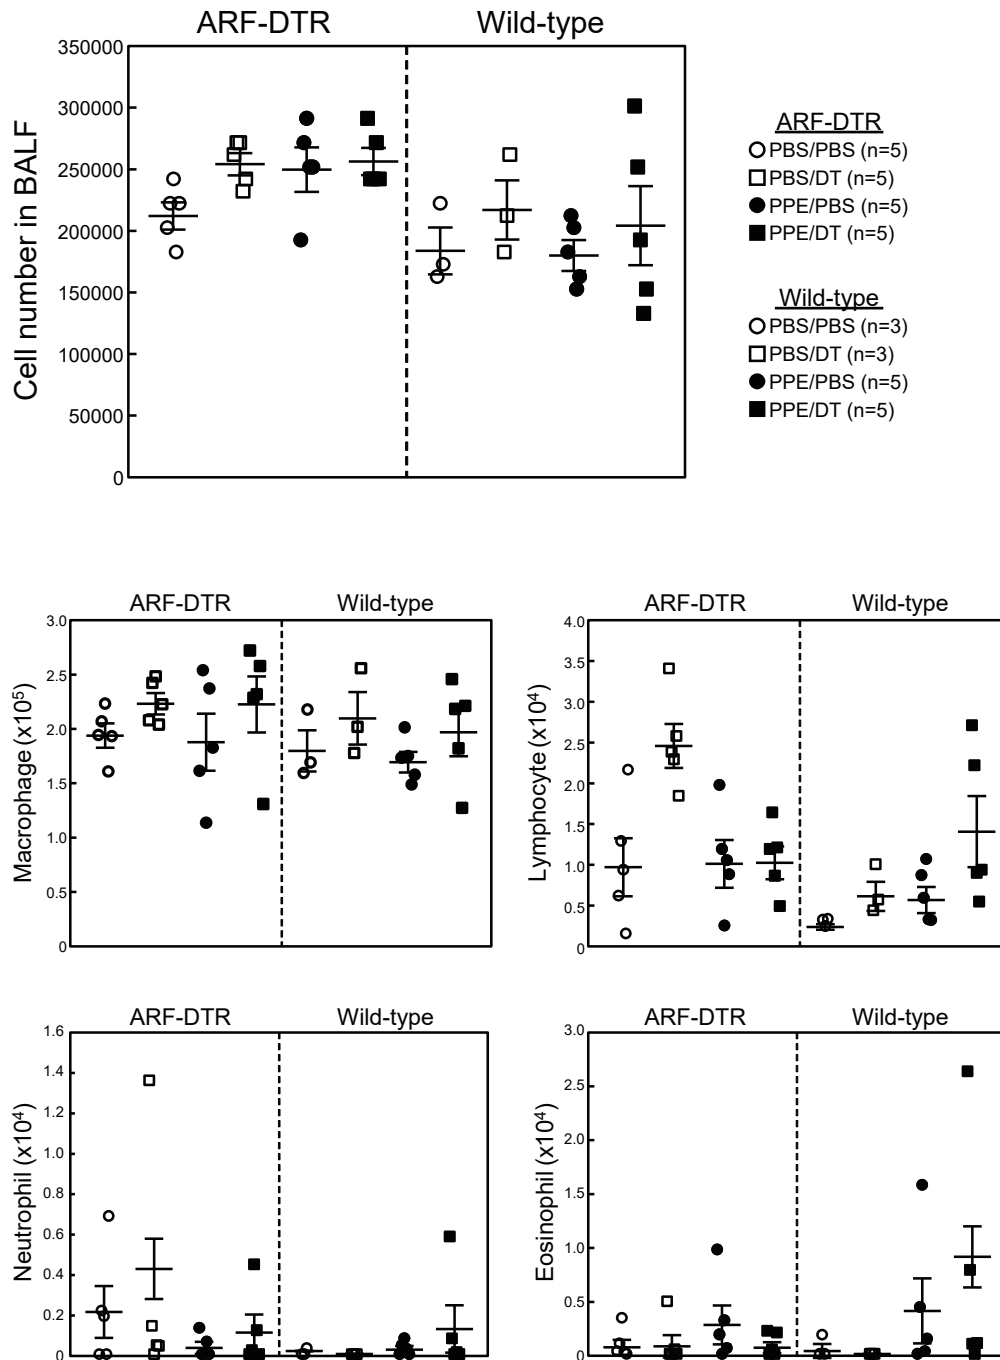

Supplement: ACEL-17-e12827-s003.pdf [file ACEL-17-e12827-s003.pdf]
